# Supplementary material
Source: PubMed Central journal article supplement (PMC8293024)
Supplement: jama-e218694-s001.pdf [file jama-e218694-s001.pdf]

## Supplemental Online Content

Kluender R, Mahoney N, Wong F, Yin W. Medical debt in the US, 2009-2020. *JAMA*. doi:10.1001/jama.2021.8694

### eMethods

**eFigure 1.** Stock and Flow of Medical and Nonmedical Debt in Collections by Year (Alternative Sample)

**eFigure 2.** Stock of Medical Debt by County and Zip Code Income Decile (Alternative Sample)

**eFigure 3.** Trends in Medical and Nonmedical Debt in Collections by Medicaid Expansion Status (Alternative Sample)

**eFigure 4.** Flow of Medical Debt by State Medicaid Expansion Status and Zip Code Income Decile in 2009 and 2020 (Alternative Sample)

**eFigure 5.** Trends in Medical Debt in Collections by Medicaid Expansion Status, Unnormalized

**eFigure 6.** Flow of Medical Debt by County and Zip Code Income Decile

**eTable 1.** Medical Debt Summary Statistics for 2020 Across the US and by US Census Region (Alternative Sample)

**eTable 2.** States by Census Region

**eTable 3.** States by Expansion Status

**eTable 4.** Regression Estimates

**eTable 5.** Regression Estimates (Additional Controls)

**eTable 6.** Medical Debt Summary Statistics, 2009 to 2020

**eTable 7.** Medical Debt Summary Statistics by Income Decile, 2009 and 2020

**eTable 8.** Medical Debt Summary Statistics by Medicaid Expansion Group, 2009 and 2020

**eTable 9.** Regression Estimates

### eReferences

This supplemental material has been provided by the authors to give readers additional information about their work.

# eMethods

## Sample and Variable Construction

### 1.1 TransUnion Credit Report Data

We use credit data provided by TransUnion, a global information solutions company, through a relationship with the Kilts Center for Marketing at The University of Chicago Booth School of Business. The data are an anonymized, nationally representative 10% random sample of persons with credit reports. The data was constructed by starting with a 10% random sample of persons in January 2000 and tracking these persons on a monthly basis from January 2000 to June 2020. In each month, a small percentage of people leave the panel (e.g., due to death). To maintain the representativeness of the data, each month a random 10% sample of persons with new credit reports (e.g., first-time borrowers) is added to the panel.

### 1.2 Sample Restrictions

The TransUnion variables were modified and enriched in January 2009. To maintain a consistent sample, we drop observations from prior to January 2009. We also drop persons who have a missing age or ZIP code, persons residing outside of the 50 states or the District of Columbia, and persons with an empty credit report, defined as a report with no credit record of any kind (i.e. no active or non-active tradeline, collection, or public record). The remaining sample (32.7 million observations in June 2020) is larger than 10% of the US adult population and may still include reports for persons who had emigrated and multiple reports for a person that were not linkable based on information provided to the credit bureau. The de-identified nature of the data precludes efforts to quantify the prevalence of these types of accounts in our sample.

### 1.3 Geographic Variables

We construct geographic variables based on person's ZIP code in the TransUnion data and crosswalks from government sources.

- To map ZIP codes to counties, we use *4<sup>th</sup> quarter 2019 ZIP-COUNTY* crosswalk from HUD's Office of Policy Development and Research (PD&R).<sup>1</sup> Since some ZIP codes cross multiple counties, we assign each ZIP code to the county with the plurality of residential addresses, as reported in the PD&R crosswalk file.

---

<sup>1</sup> [https://www.huduser.gov/portal/datasets/usps\\_crosswalk.html](https://www.huduser.gov/portal/datasets/usps_crosswalk.html)

- We map county to state using the “State-County” level crosswalk (Summary Level 050) in *2018 State, County, Minor Civil Division, and Incorporated Place FIPS Codes* from US Census Bureau.<sup>II</sup>
- We map state to Census Region using the *2018 Census Bureau Region and Division Codes and State FIPS Codes* from US Census Bureau.<sup>II</sup>

## 1.4 Variable Definitions

*Medical (Nonmedical) Debt in Collections:* We define a medical debt in collections as a collection where i) Compliance Remark Code is not “AID”<sup>III</sup>, ii) Current Balance Amount is positive, iii) Close Date is empty, and iv) the collection is classified as medical debt.<sup>IV</sup> A nonmedical debt has the same definition as medical debt, except that it is classified as nonmedical.

We identify a collection by Subject Key (the unique identifier for person) and Collection Key. In the collection segment of TransUnion data, lines that have the same Subject Key and Collection Key in the same month are treated as duplicated collections, and only the line with the maximum Current Balance Amount among them is used.

*Delinquent Tradelines:* We define a delinquent tradeline as a tradeline where i) Compliance Remark Code is not “AID”, ii) Current Balance Amount is positive, iii) Close Date is empty, iv) the tradeline is classified as nonmedical, and v) Manner of Payment (MOP) is not “01”, “02”, “03”, “8P”, “9P” or “UR.”<sup>V</sup>

*Stock of Medical (Nonmedical) Debt in Collections:* We define a person’s stock of medical (nonmedical) debt in collections as the sum of the Current Balance Amount of all the medical (nonmedical) debts in collections for that person. We use the CPI-U to inflation-adjust dollar amounts to June 2020.<sup>VI</sup> After inflation adjusting, we Winsorize the individual-month-level stock medical (nonmedical) debt at the 99.99<sup>th</sup> percentile to reduce the influence of outliers. The 99.99<sup>th</sup> percentile is calculated using the pooled June 2009-2020 data, separately for medical and nonmedical debt. Medical debt is Winsorized at \$319,333.31 and nonmedical debt is Winsorized at \$198,365.44.

*Mean Stock of Medical (Nonmedical) Debt in Collections* is calculated by dividing the total stock medical (nonmedical) debt by the total number of observations.

---

<sup>II</sup> <https://www.census.gov/geographies/reference-files/2018/demo/popest/2018-fips.html>

<sup>III</sup> In Compliance Remark Code, "AID" stands for "Account information disputed by consumer."

<sup>IV</sup> This classifier variable takes on a value of 1 if the debt is “nonmedical” and 2 if the debt is “medical.”

<sup>V</sup> In Manner of Payment, "01" is for "Current account", "02" for "Account 30 days past due date", "03" for "Account 60 days past due date ", "8P" for "Account paid in full, was a repossession", "9P" for "Account paid in full, was a collection or charge-off", and "UR" for "Unrated".

<sup>VI</sup>

[https://data.bls.gov/timeseries/CUUR0000SA0?amp%253bdata\\_tool=XGtable&output\\_view=data&include\\_graphs=true](https://data.bls.gov/timeseries/CUUR0000SA0?amp%253bdata_tool=XGtable&output_view=data&include_graphs=true).

*Flow of Medical (Nonmedical) Debt in Collections:* We define the flow of medical (nonmedical) debt as the sum of new medical (nonmedical) debt in collections that year. A new medical (nonmedical) debt in collections is defined as a medical (nonmedical) debt in collections in a given month that was not reported to TransUnion in the previous month. We then calculate the flow of medical debt as the sum of all new debt that appeared on a person’s credit report in the preceding 12 months (e.g., the flow for 2020 is calculated as the sum of new debt from July 2019 to June 2020). After inflation adjusting, we Winsorize the person-month-level flow medical (nonmedical) debt at the 99.99<sup>th</sup> percentile (\$173,478.91 for medical and \$138,021.03 for nonmedical), which is calculated by pooling together new medical (nonmedical) debt from all years.

*Mean Flow of Medical (Nonmedical) Debt in Collections* is calculated by dividing the total Flow of Medical (Nonmedical) Debt in Collections by the total number of observations.

### 1.5 Annualizing the 2009 Flow Data

Since our earliest data is January 2009, when calculating the flow of new medical (nonmedical) debt in collections, we can only start from February 2009 (we need to use January 2009 data to determine whether the account in collections is newly reported). As years are defined from the previous July to current June, we don’t have the complete data for year 2009. We use flows from February to June 2009 and all data from years 2010 to 2020 to annualize the 2009 flow.

More specifically, three outcomes are subject to this adjustment: total flow medical (nonmedical) debt in collections, percentage with flow medical (nonmedical) debt in collections, and number of unique valid samples that ever exist in the data for the given year. Other outcomes of interest can be derived from these three. We calculated these three outcomes using both the full-year data (July to June for each year) and the February to June data for the years 2010 to 2020. Then, we calculated the average ratio of the February-to-June value to the full-year value across these 11 years, which is used to adjust the 2009 flow value.

### 1.6 ZIP Code-Level Total Population and Average Income Data

To construct measures of medical debt by ZIP code income decile, we require data on ZIP code average income and ZIP code total population. The ZIP code total population data and the per capita income data are from the 2014-2018 ACS 5-Year Estimates.<sup>VII</sup> We inflation adjust the income values to June 2020 using the CPI-U.<sup>VI</sup>

---

<sup>VII</sup> From: <https://data.census.gov/cedsci/>.

## Linear Regression Model

To further examine the association between the Medicaid expansions and medical debt, we estimate a series of linear regression models that sequentially add controls for state-level demographic and economic characteristics.

Our baseline specification is a linear regression of the percentage change in the mean flow medical debt between 2013 and 2020 (defined the difference between the 2020 value and 2013 value, divided by the 2013 value) on indicator variables for states that expanded Medicaid in 2014, states that expanded Medicaid after 2014, and a constant. We estimate this model on data averaged at the state level (N=51). By estimating the model on state-level data, our standard errors are similar to what we would have obtained by estimating the model of individual-level data and clustering our standard errors at the state level.

To examine the sensitivity of the results, we estimate specifications that control for the state-level change in the unemployment rate, change in percentage of the population aged 65+, change in the percentage with a bachelor's degree or higher (conditional on 25+ years old), and change in inflation-adjusted median income. These controls were constructed using the 1-year ACS from 2019 and 2013. We use 2019 data because values for 2020 are not yet available. As shown in Table 6, the stable estimates of the percentage change in medical debt in expansion states, along with the sizeable increase in the R-squared, reduce concerns about confounding factors<sup>1</sup>.

To further assess the sensitivity of our estimates, we estimate specifications that control for changes in the state-level share of for-profit hospital beds and state-level "surprise" out-of-network billing legislation. Changes in the share of for-profit hospital beds are calculated using the 2013 and 2018 Provider of Service files, compiled by Sacarny<sup>2</sup> and the billing laws are taken from the Commonwealth Fund<sup>3</sup>. We also estimate specifications that drop the 3 states (CA, MN, WA) that implemented general collections legislation during the 2013-2020 period, as documented by Fedaseyeu<sup>4</sup> and Fonseca and Zafar<sup>5</sup>. As shown in eTable 5, the estimates are very similar across specifications, providing confidence in the robustness of our results.

## Alternative Sample Restriction

To examine sensitivity to dropping empty credit records (defined as a report with no credit record of any kind), we reproduce the main exhibits including these empty credit records. Compared to the baseline sample, which has 32.7 million observations in June 2020, the alternative sample has 37.7 million observations in June 2020, substantially more than 10% of the US adult population.

eTable 1 and eFigures 1-4 replicate the exhibits in the manuscript using this alternative sample. Because these additional observations increase the denominator, but not the numerator, the means and prevalences are reduced. The qualitative patterns are unchanged.

**eFigure 1. Stock and Flow of Medical and Nonmedical Debt in Collections by Year (Alternative Sample)**

A. Stock of debt (all debt in collections listed on credit reports).

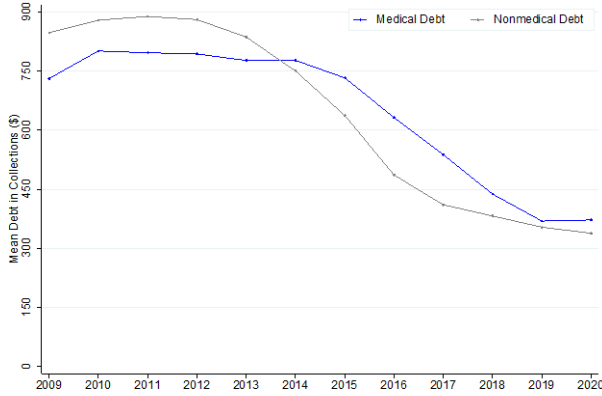

B. Flow of debt (new debt in collections accrued during the preceding 12 mo)

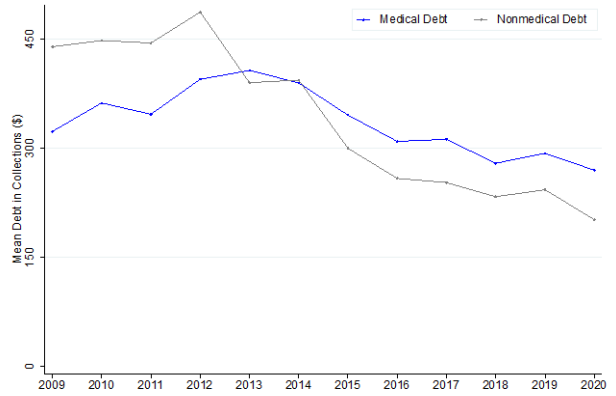

**eFigure 2. Stock of Medical Debt by County and Zip Code Income Decile (Alternative Sample)**

A. Mean stock of medical debt by county

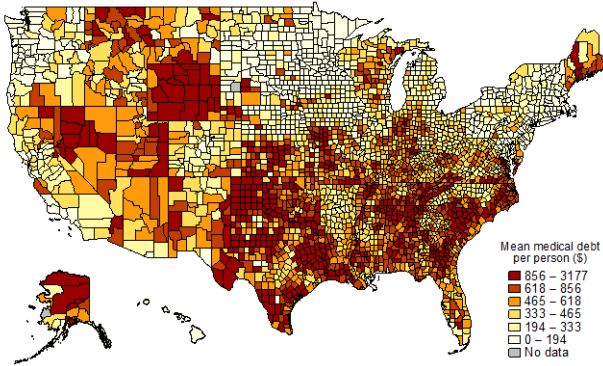

B. Stock of medical debt by zip code income decile

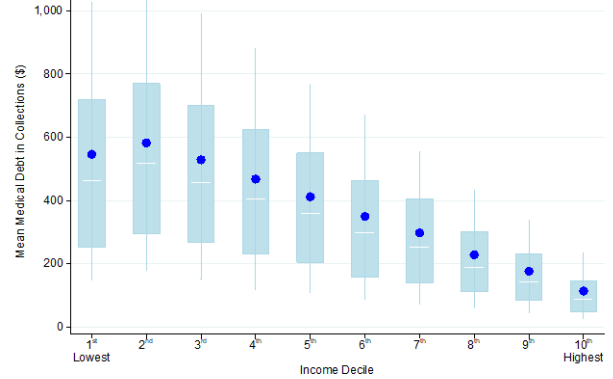

B, The dots are means, the black horizontal lines are medians, the boxes are the interquartile ranges, and the whiskers are the range (10-90) for stock by zip code income decile as of June 2020. The zip codes were assigned to income deciles using per-capita income estimates from the 5-year American Community Survey (2014-2018), weighting each zip code by its population in the American Community Survey. The median number of zip codes in each income decile was 3,475 (interquartile range, 2,399-3,762) in 2020.



**eFigure 3. Trends in Medical and Nonmedical Debt in Collections by Medicaid Expansion Status (Alternative Sample)**

A. Flow of medical debt

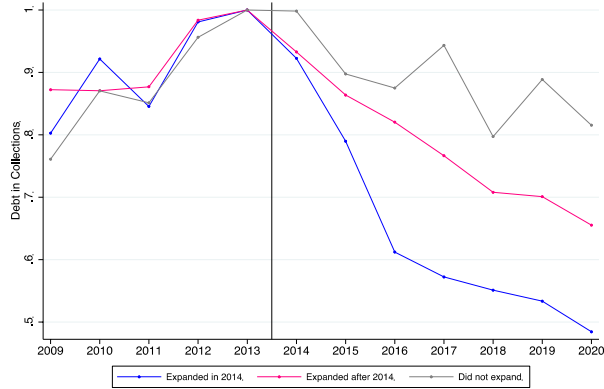

B. Flow of nonmedical debt

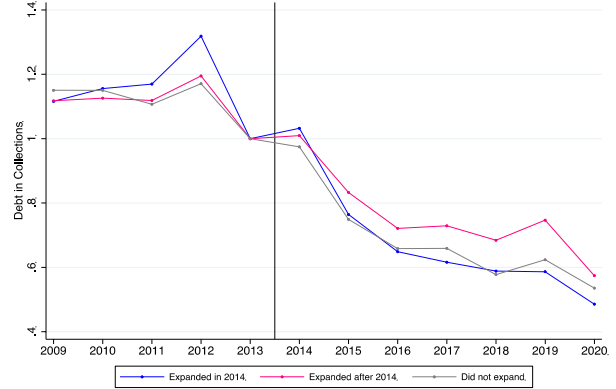

The plots show the flow of mean medical and nonmedical debt in collections, grouping states by Medicaid expansion status and normalizing values for each group to 1 in 2013 (eg, the normalized value for 2020 is calculated as the ratio of the unnormalized 2020 and 2013 values for that group). Values are from June of each year. The vertical line indicates the timing of initial Medicaid expansion.

**eFigure 4.** Flow of Medical Debt by State Medicaid Expansion Status and Zip Code Income Decile in 2009 and 2020 (Alternative Sample)

A. States that expanded Medicaid

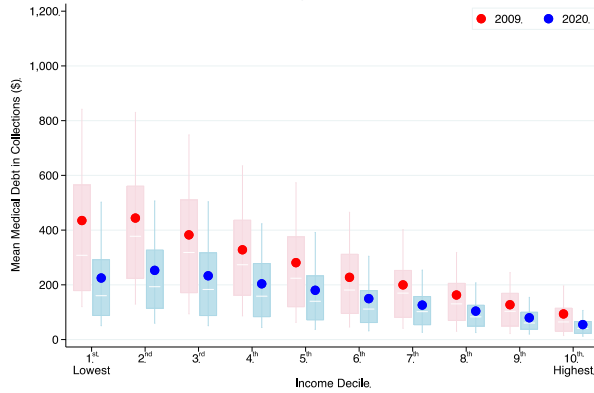

B. States that did not expand Medicaid

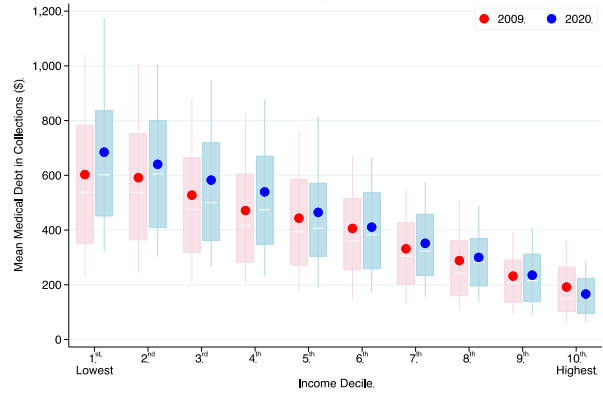

The dots are means, the black horizontal lines are medians, the boxes are the interquartile ranges, and the whiskers are the range (10-90) for stock by zip code income decile as of June 2020. The zip codes were assigned to income deciles using per-capita income estimates from the 5-year American Community Survey (2014-2018), weighting each zip code by its population in the American Community Survey. The median number of zip codes in each income decile was 3,474 (interquartile range, 2,396-3,766) in 2009, and 3,475 (interquartile range, 2,399-3,762) in 2020.

**eFigure 5.** Trends in Medical Debt in Collections by Medicaid Expansion Status, Unnormalized

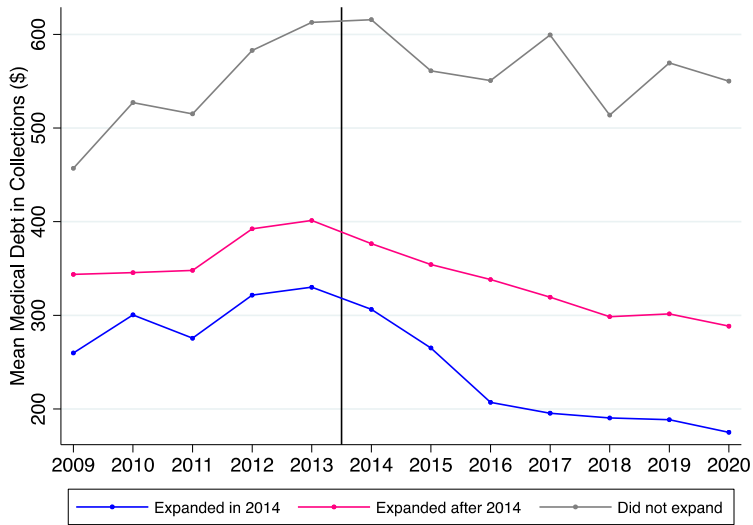

The plot shows the flow of mean medical debt in collections, grouping states by Medicaid expansion. Values are from June of each year. The vertical line indicates the timing of initial Medicaid expansion.

**eFigure 6. Flow of Medical Debt by County and Zip Code Income Decile**

A. Mean flow of medical debt by county

B. Mean flow of medical debt by zip code income decile

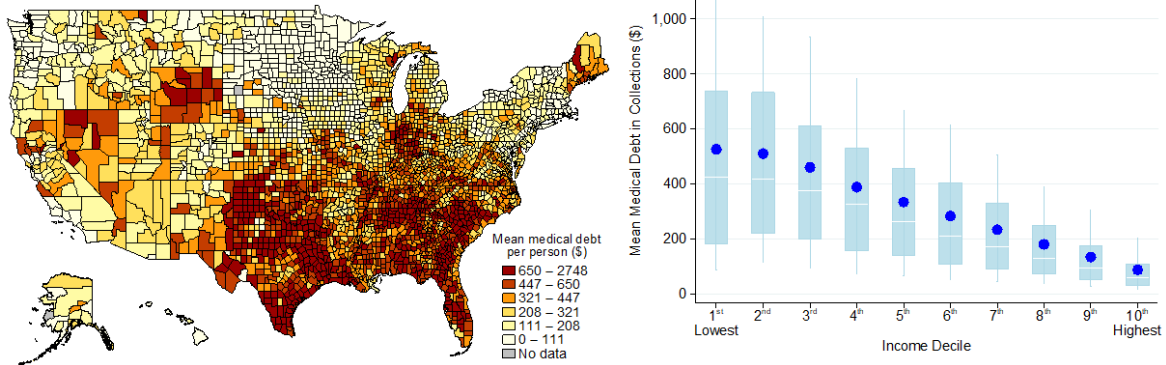

B, The dots are means, the black horizontal lines are medians, the boxes are the interquartile ranges, and the whiskers are the range (10-90) for stock by zip code income decile as of June 2020. The zip codes were assigned to income deciles using per-capita income estimates from the 5-year American Community Survey (2014-2018), weighting each zip code by its population in the American Community Survey. The median number of zip codes in each income decile was 3,474 (interquartile range, 2,398-3,762) in 2020.

**eTable 1.** Medical Debt Summary Statistics for 2020 Across the US and by US Census Region (Alternative Sample)

|                                                      | <b>Across US</b> | <b>Northeast</b> | <b>South</b> | <b>Midwest</b> | <b>West</b> |
|------------------------------------------------------|------------------|------------------|--------------|----------------|-------------|
| <b>Stock of Medical Debt<sup>a</sup></b>             |                  |                  |              |                |             |
| Medical Debt in Collections (%) <sup>b</sup>         | 15.4             | 9.4              | 20.6         | 15.5           | 11.0        |
| Mean Medical Debt (\$)                               | 372              | 145              | 532          | 336            | 300         |
| Mean Medical Debt for those with Debt (\$)           | 2,424            | 1,549            | 2,595        | 2,169          | 2,733       |
| Mean Nonmedical Debt (\$)                            | 338              | 277              | 401          | 294            | 316         |
| Sample Sizes for June 2020 <sup>c</sup>              |                  |                  |              |                |             |
| Medical Debt in Collections                          | 5,803,567        | 595,662          | 3,029,355    | 1,188,722      | 989,828     |
| Nonmedical Debt in Collections                       | 6,204,151        | 840,501          | 2,867,876    | 1,223,042      | 1,272,732   |
| All Individuals                                      | 37,690,810       | 6,328,240        | 14,720,873   | 7,656,723      | 8,984,974   |
|                                                      |                  |                  |              |                |             |
| <b>Flow of Medical Debt<sup>d</sup></b>              |                  |                  |              |                |             |
| Medical Debt in Collections (%) <sup>b</sup>         | 11.6             | 6.3              | 16.9         | 11.7           | 6.8         |
| Mean Medical Debt (\$)                               | 270              | 95               | 444          | 230            | 144         |
| Mean Medical Debt for those with Debt (\$)           | 2320             | 1500             | 2630         | 1962           | 2123        |
| Mean Nonmedical Debt (\$)                            | 202              | 161              | 247          | 188            | 169         |
| Sample Sizes for July 2019 to June 2020 <sup>c</sup> |                  |                  |              |                |             |
| Medical Debt in Collections                          | 4,388,613        | 400,819          | 2,482,735    | 895,698        | 609,361     |
| Nonmedical Debt in Collections                       | 4,688,373        | 597,746          | 2,239,332    | 952,112        | 899,183     |
| All Individuals                                      | 37,690,810       | 6,328,240        | 14,720,873   | 7,656,723      | 8,984,974   |

<sup>a</sup> Measures all debt in collections listed on credit reports.

<sup>b</sup> Ratio of persons with medical debt in collections to all individuals.

<sup>c</sup> Nationally representative, randomly selected 10% panel of all individuals with credit reports maintained by TransUnion.

<sup>d</sup> Measures new debt in collections accrued during the preceding 12 months.

**eTable 2.** States by Census Region

| Census Region | States                                                                                                                                                                                               |
|---------------|------------------------------------------------------------------------------------------------------------------------------------------------------------------------------------------------------|
| Northeast     | Connecticut, Maine, Massachusetts, New Hampshire, Rhode Island, Vermont, New Jersey, New York, Pennsylvania                                                                                          |
| Midwest       | Indiana, Illinois, Michigan, Ohio, Wisconsin, Iowa, Nebraska, Kansas, North Dakota, Minnesota, South Dakota, Missouri                                                                                |
| South         | Delaware, District of Columbia, Florida, Georgia, Maryland, North Carolina, South Carolina, Virginia, West Virginia, Alabama, Kentucky, Mississippi, Tennessee, Arkansas, Louisiana, Oklahoma, Texas |
| West          | Arizona, Colorado, Idaho, New Mexico, Montana, Utah, Nevada, Wyoming, Alaska, California, Hawaii, Oregon, Washington                                                                                 |

From [https://www2.census.gov/geo/pdfs/maps-data/maps/reference/us\\_regdiv.pdf](https://www2.census.gov/geo/pdfs/maps-data/maps/reference/us_regdiv.pdf).

**eTable 3.** States by Expansion Status

| Expansion Status    | States                                                                                                                                                                                                                                                                                                           |
|---------------------|------------------------------------------------------------------------------------------------------------------------------------------------------------------------------------------------------------------------------------------------------------------------------------------------------------------|
| Expanded in 2014    | Arizona, Arkansas, California, Colorado, Connecticut, Delaware, District of Columbia, Hawaii, Illinois, Iowa, Kentucky, Maryland, Massachusetts, Minnesota, Missouri, Nebraska, Nevada, New Jersey, New Mexico, New York, North Dakota, Ohio, Oklahoma, Oregon, Rhode Island, Vermont, Washington, West Virginia |
| Expanded after 2014 | Alaska, Idaho, Indiana, Louisiana, Maine, Michigan, Montana, New Hampshire, Pennsylvania, Utah, Virginia                                                                                                                                                                                                         |
| Did not expand      | Alabama, Florida, Georgia, Kansas, Mississippi, North Carolina, South Carolina, South Dakota, Tennessee, Texas, Wisconsin, Wyoming                                                                                                                                                                               |

From Kaiser Family Foundation (<https://www.kff.org/health-reform/state-indicator/state-activity-around-expanding-medicaid-under-the-affordable-care-act/>).

**eTable 4. Regression Estimates**

| <b>Dependent Variable: Percentage Change in Mean Flow Medical Debt, 2020-2013</b> |                       |                       |                       |                       |                       |
|-----------------------------------------------------------------------------------|-----------------------|-----------------------|-----------------------|-----------------------|-----------------------|
|                                                                                   | <b>(1)</b>            | <b>(2)</b>            | <b>(3)</b>            | <b>(4)</b>            | <b>(5)</b>            |
| Expanded in 2014 (dummy)                                                          | -34.0(-49.4 to -18.5) | -34.8(-47.4 to -22.2) | -33.4(-46.1 to -20.7) | -32.8(-46.1 to -19.6) | -26.9(-39.9 to -13.9) |
| Expanded after 2014 (dummy)                                                       | -20.4(-39.6 to -1.2)  | -23.5(-40.5 to -6.5)  | -21.0(-38.0 to -4.0)  | -20.9(-37.7 to -4.0)  | -19.2(-38.0 to -0.4)  |
| Constant                                                                          | -10.0(-22.8 to 2.8)   | 11.0(-12.6 to 34.5)   | 24.8(-12.7 to 62.3)   | 32.4(-36.1 to 101.0)  | 35.7(-32.1 to 103.5)  |
| <i>Controls</i>                                                                   |                       |                       |                       |                       |                       |
| Change in unemployment rate                                                       |                       | x                     | x                     | x                     | x                     |
| Change in % 65+ age old                                                           |                       |                       | x                     | x                     | x                     |
| Change in % with bachelor's degree or higher (25+ years old)                      |                       |                       |                       | x                     | x                     |
| Change in median income                                                           |                       |                       |                       |                       | x                     |
| N                                                                                 | 51                    | 51                    | 51                    | 51                    | 51                    |
| Adjusted R-squared                                                                | 0.369                 | 0.408                 | 0.406                 | 0.395                 | 0.422                 |

Change of Expanded in 2014: -44.0(-52.7 to -35.2); Change of Expanded after 2014: -30.4(-44.8 to -16.1); Change of Did not expand: -10(-22.8 to 2.8).

State level regression weighted by population in 2018 5-year ACS (analytic weight). Controls are from 1-year ACS. All dollar amounts are inflated adjusted to June 2020. 95% confidence intervals in parentheses.



**eTable 5.** Regression Estimates (Additional Controls)

| <b>Dependent Variable: Percentage change in Per Capita Flow of Medical Debt, 2020-2013</b> |                           |                           |                           |                           |                           |                           |                           |                           |
|--------------------------------------------------------------------------------------------|---------------------------|---------------------------|---------------------------|---------------------------|---------------------------|---------------------------|---------------------------|---------------------------|
|                                                                                            | <b>(1)</b>                | <b>(2)</b>                | <b>(3)</b>                | <b>(4)</b>                | <b>(5)</b>                | <b>(6)</b>                | <b>(7)</b>                | <b>(8)</b>                |
| Expanded in 2014 (dummy)                                                                   | -34.0<br>(-49.4 to -18.5) | -34.2<br>(-50.1 to -18.3) | -32.4<br>(-46.4 to -18.5) | -28.2<br>(-43.0 to -13.5) | -26.9<br>(-39.9 to -13.9) | -26.4<br>(-40.8 to -12.1) | -28.5<br>(-41.5 to -15.6) | -26.9<br>(-39.2 to -14.5) |
| Expanded after 2014 (dummy)                                                                | -20.4<br>(-39.6 to -1.2)  | -20.8<br>(-40.8 to -0.9)  | -20.8<br>(-40.6 to -1.0)  | -20.4<br>(-39.7 to -1.1)  | -19.2<br>(-38.0 to -0.4)  | -18.7<br>(-40.1 to 2.6)   | -18.7<br>(-37.8 to 0.4)   | -18.9<br>(-37.0 to -0.8)  |
| Constant                                                                                   | -10.0<br>(-22.8 to 2.8)   | -9.7<br>(-22.5 to 3.1)    | -10.9<br>(-22.3 to 0.4)   | -10.0<br>(-22.9 to 2.8)   | 35.7<br>(-32.1 to 103.5)  | 35.2<br>(-34.5 to 105.0)  | 40.7<br>(-35.0 to 116.4)  | 24.1<br>(-43.2 to 91.4)   |
| <i>Controls</i>                                                                            |                           |                           |                           |                           |                           |                           |                           |                           |
| Change in unemployment rate                                                                |                           |                           |                           |                           | x                         | x                         | x                         | x                         |
| Change in % 65+ years old                                                                  |                           |                           |                           |                           | x                         | x                         | x                         | x                         |
| Change in % with bachelors degree or higher (25+ years old)                                |                           |                           |                           |                           | x                         | x                         | x                         | x                         |
| Change in median income                                                                    |                           |                           |                           |                           | x                         | x                         | x                         | x                         |
| Change in for-profit hospital beds                                                         |                           | x                         |                           |                           |                           | x                         |                           |                           |
| Comprehensive Surprise Billing Protections                                                 |                           |                           | x                         |                           |                           |                           | x                         |                           |
| Partial Surprise Billing Protections                                                       |                           |                           | x                         |                           |                           |                           | x                         |                           |
| Exclude CA, MN, WA                                                                         |                           |                           |                           | x                         |                           |                           |                           | x                         |
| N                                                                                          | 51                        | 51                        | 51                        | 48                        | 51                        | 51                        | 51                        | 48                        |
| Adjusted R-sq                                                                              | 0.369                     | 0.355                     | 0.350                     | 0.292                     | 0.422                     | 0.409                     | 0.408                     | 0.300                     |

Change of Expanded in 2014: -44.0(-52.7 to -35.2); Change of Expanded after 2014: -30.4(-44.8 to -16.1); Change of Did not expand: -10(-22.8 to 2.8).

State level regression weighted by population in 2018 5-year ACS (analytic weight). For-profit provider rate is from Provider of Service data. Surprise Billing Protections status is from The Commonwealth Fund (3). CA, MN, and WA are excluded to examine sensitivity to collections legislation that was introduced in these states during the 2013-2020 time period (4; 5). Other controls are from 1-year ACS. All dollar amounts are inflated adjusted to June 2020. 95% confidence intervals in parentheses.

**eTable 6.** Medical Debt Summary Statistics, 2009 to 2020

|                                                      | 2009       | 2010       | 2011       | 2012       | 2013       | 2014       | 2015       | 2016       | 2017       | 2018       | 2019       | 2020       |
|------------------------------------------------------|------------|------------|------------|------------|------------|------------|------------|------------|------------|------------|------------|------------|
| <b>Stock<sup>a</sup></b>                             |            |            |            |            |            |            |            |            |            |            |            |            |
| Medical Debt in Collections (%) <sup>b</sup>         | 23.2       | 24.3       | 24.5       | 24.6       | 24.6       | 24.5       | 23.7       | 22.3       | 20.6       | 18.8       | 16.4       | 17.8       |
| Mean Medical Debt (\$)                               | 750        | 827        | 822        | 826        | 814        | 820        | 780        | 682        | 587        | 485        | 417        | 429        |
| Mean Medical Debt for those with Debt (\$)           | 3,439      | 3,603      | 3,370      | 3,379      | 3,340      | 3,370      | 3,312      | 3,079      | 2,857      | 2,584      | 2,745      | 2,424      |
| Mean Nonmedical Debt (\$)                            | 869        | 908        | 918        | 916        | 877        | 791        | 678        | 524        | 448        | 423        | 400        | 390        |
| Sample Sizes for June 2020 <sup>c</sup>              |            |            |            |            |            |            |            |            |            |            |            |            |
| Medical Debt in Collections                          | 6,225,530  | 6,655,733  | 6,917,862  | 7,084,169  | 7,222,988  | 7,362,270  | 7,223,982  | 6,841,810  | 6,417,274  | 5,933,873  | 5,232,480  | 5,803,567  |
| Nonmedical Debt in Collections                       | 7,102,345  | 7,496,384  | 7,795,315  | 7,829,671  | 7,967,480  | 7,864,797  | 7,589,655  | 6,927,145  | 6,487,319  | 6,243,879  | 6,318,729  | 6,204,151  |
| All Individuals                                      | 26,820,787 | 27,441,406 | 28,193,865 | 28,809,701 | 29,420,134 | 30,036,333 | 30,445,743 | 30,732,670 | 31,106,805 | 31,509,932 | 31,899,487 | 32,669,823 |
|                                                      |            |            |            |            |            |            |            |            |            |            |            |            |
| <b>Flow<sup>d</sup></b>                              |            |            |            |            |            |            |            |            |            |            |            |            |
| Medical Debt in Collections (%) <sup>b</sup>         | 14.3       | 14.4       | 14.0       | 15.5       | 15.7       | 15.6       | 14.5       | 14.0       | 14.1       | 13.3       | 13.5       | 13.0       |
| Mean Medical Debt (\$)                               | 332        | 376        | 359        | 412        | 427        | 412        | 370        | 333        | 340        | 308        | 325        | 311        |
| Mean Medical Debt for those with Debt (\$)           | 2,326      | 2,606      | 2,563      | 2,665      | 2,723      | 2,636      | 2,553      | 2,384      | 2,411      | 2,316      | 2,407      | 2,396      |
| Mean Nonmedical Debt (\$)                            | 452        | 464        | 460        | 508        | 410        | 416        | 321        | 279        | 276        | 258        | 275        | 233        |
| Sample Sizes for July 2019 to June 2020 <sup>c</sup> |            |            |            |            |            |            |            |            |            |            |            |            |
| Medical Debt in Collections                          | 3,831,300  | 3,955,774  | 3,951,809  | 4,451,485  | 4,614,147  | 4,690,576  | 4,407,713  | 4,295,551  | 4,382,006  | 4,186,489  | 4,302,175  | 4,240,869  |
| Nonmedical Debt in Collections                       | 5,494,610  | 5,397,238  | 5,454,426  | 5,744,339  | 5,551,042  | 5,830,848  | 5,302,236  | 4,840,979  | 4,890,268  | 4,550,778  | 4,424,641  | 4,519,576  |
| All Individuals                                      | 26,820,787 | 27,441,406 | 28,193,865 | 28,809,701 | 29,420,134 | 30,036,333 | 30,445,743 | 30,732,670 | 31,106,805 | 31,509,932 | 31,899,487 | 32,669,823 |

<sup>a</sup> Measures all debt in collections listed on credit reports.

<sup>b</sup> Ratio of persons with medical debt in collections to all individuals.

<sup>c</sup> Nationally representative, randomly selected 10% panel of all individuals with credit reports maintained by TransUnion.

<sup>d</sup> Measures new debt in collections accrued during the preceding 12 months.

**eTable 7. Medical Debt Summary Statistics by Income Decile, 2009 and 2020**

| <b>Income Decile<sup>a</sup></b>                          | <b>1st</b> | <b>2nd</b> | <b>3rd</b> | <b>4th</b> | <b>5th</b> | <b>6th</b> | <b>7th</b> | <b>8th</b> | <b>9th</b> | <b>10th</b> |
|-----------------------------------------------------------|------------|------------|------------|------------|------------|------------|------------|------------|------------|-------------|
| <b>Panel A. Nationwide</b>                                |            |            |            |            |            |            |            |            |            |             |
| <i>2020</i>                                               |            |            |            |            |            |            |            |            |            |             |
| Per Capita Income (\$)                                    | 16,708     | 21,388     | 24,137     | 26,489     | 28,917     | 31,615     | 34,858     | 39,213     | 45,972     | 66,452      |
| Mean Medical Debt in Collections, Stock <sup>b</sup> (\$) | 677        | 695        | 621        | 544        | 473        | 399        | 336        | 256        | 196        | 126         |
| Mean Medical Debt in Collections, Flow <sup>c</sup> (\$)  | 525        | 511        | 460        | 389        | 334        | 283        | 234        | 180        | 134        | 87          |
| <i>2009</i>                                               |            |            |            |            |            |            |            |            |            |             |
| Per capita Income (\$)                                    | 16,689     | 21,399     | 24,144     | 26,496     | 28,924     | 31,627     | 34,871     | 39,219     | 45,977     | 66,513      |
| Mean Medical Debt in Collections, Stock <sup>b</sup> (\$) | 1,229      | 1,176      | 1,037      | 899        | 805        | 687        | 578        | 453        | 363        | 258         |
| Mean Medical Debt in Collections, Flow <sup>c</sup> (\$)  | 542        | 527        | 463        | 394        | 359        | 304        | 257        | 199        | 158        | 114         |
| <b>Panel B. States Expanded Medicaid in 2014</b>          |            |            |            |            |            |            |            |            |            |             |
| <i>2020</i>                                               |            |            |            |            |            |            |            |            |            |             |
| Per Capita Income (\$)                                    | 16,590     | 21,358     | 24,125     | 26,490     | 28,922     | 31,625     | 34,935     | 39,215     | 45,987     | 67,926      |
| Mean Medical Debt in Collections, Stock <sup>b</sup> (\$) | 475        | 510        | 452        | 401        | 352        | 286        | 241        | 197        | 150        | 104         |
| Mean Medical Debt in Collections, Flow <sup>c</sup> (\$)  | 278        | 303        | 275        | 238        | 208        | 171        | 142        | 117        | 88         | 60          |
| <i>2009</i>                                               |            |            |            |            |            |            |            |            |            |             |
| Per capita Income (\$)                                    | 16,586     | 21,376     | 24,130     | 26,496     | 28,933     | 31,638     | 34,951     | 39,223     | 45,984     | 67,862      |
| Mean Medical Debt in Collections, Stock <sup>b</sup> (\$) | 1,108      | 1,071      | 945        | 818        | 692        | 554        | 483        | 396        | 306        | 219         |
| Mean Medical Debt in Collections, Flow <sup>c</sup> (\$)  | 458        | 461        | 397        | 338        | 289        | 232        | 205        | 166        | 130        | 95          |
| <b>Panel C. States Did Not Expand Medicaid</b>            |            |            |            |            |            |            |            |            |            |             |
| <i>2020</i>                                               |            |            |            |            |            |            |            |            |            |             |
| Per Capita Income (\$)                                    | 16,780     | 21,398     | 24,142     | 26,493     | 28,894     | 31,616     | 34,710     | 39,214     | 45,954     | 63,558      |
| Mean Medical Debt in Collections, Stock <sup>b</sup> (\$) | 913        | 910        | 812        | 752        | 643        | 563        | 478        | 380        | 298        | 205         |
| Mean Medical Debt in Collections, Flow <sup>c</sup> (\$)  | 836        | 760        | 680        | 624        | 533        | 468        | 396        | 333        | 260        | 184         |
| <i>2009</i>                                               |            |            |            |            |            |            |            |            |            |             |
| Per Capita Income (\$)                                    | 16,768     | 21,404     | 24,154     | 26,499     | 28,897     | 31,636     | 34,703     | 39,216     | 45,986     | 63,681      |
| Mean Medical Debt in Collections, Stock <sup>b</sup> (\$) | 1,384      | 1,336      | 1,182      | 1,067      | 1,001      | 934        | 777        | 655        | 545        | 441         |
| Mean Medical Debt in Collections, Flow <sup>c</sup> (\$)  | 630        | 611        | 541        | 485        | 454        | 416        | 338        | 293        | 235        | 196         |

<sup>a</sup> ZIP codes are assigned to income deciles using per capita income estimates from the 2014-2018 5-year ACS, weighting each ZIP code by its population in the ACS.

<sup>b</sup> Stock measures all debt in collections listed on credit reports.

<sup>c</sup> Flow measures new debt in collections accrued in the preceding 12 months.

**eTable 8.** Medical Debt Summary Statistics by Medicaid Expansion Group, 2009 and 2020

|                                           | 2009 | 2010 | 2011 | 2012 | 2013 | 2014 | 2015 | 2016 | 2017 | 2018 | 2019 | 2020 |
|-------------------------------------------|------|------|------|------|------|------|------|------|------|------|------|------|
| <b>Panel A. Expanded in 2014</b>          |      |      |      |      |      |      |      |      |      |      |      |      |
| Mean Medical Debt                         | 260  | 300  | 276  | 322  | 330  | 306  | 265  | 207  | 196  | 190  | 189  | 175  |
| Mean Nonmedical Debt                      | 424  | 442  | 447  | 508  | 388  | 403  | 302  | 258  | 248  | 240  | 245  | 206  |
| Mean Medical Debt (normalized to 2013)    | 0.79 | 0.91 | 0.84 | 0.97 | 1.00 | 0.93 | 0.80 | 0.63 | 0.59 | 0.58 | 0.57 | 0.53 |
| Mean Nonmedical Debt (normalized to 2013) | 1.09 | 1.14 | 1.15 | 1.31 | 1.00 | 1.04 | 0.78 | 0.67 | 0.64 | 0.62 | 0.63 | 0.53 |
| <b>Panel B. Expanded after 2014</b>       |      |      |      |      |      |      |      |      |      |      |      |      |
| Mean Medical Debt                         | 344  | 346  | 348  | 392  | 401  | 376  | 354  | 338  | 319  | 299  | 302  | 288  |
| Mean Nonmedical Debt                      | 370  | 374  | 372  | 400  | 337  | 342  | 287  | 250  | 255  | 243  | 270  | 212  |
| Mean Medical Debt (normalized to 2013)    | 0.86 | 0.86 | 0.87 | 0.98 | 1.00 | 0.94 | 0.88 | 0.84 | 0.80 | 0.74 | 0.75 | 0.72 |
| Mean Nonmedical Debt (normalized to 2013) | 1.10 | 1.11 | 1.10 | 1.19 | 1.00 | 1.02 | 0.85 | 0.74 | 0.76 | 0.72 | 0.80 | 0.63 |
| <b>Panel C. Did not expand</b>            |      |      |      |      |      |      |      |      |      |      |      |      |
| Mean Medical Debt                         | 457  | 527  | 515  | 583  | 613  | 616  | 561  | 551  | 599  | 514  | 569  | 550  |
| Mean Nonmedical Debt                      | 548  | 551  | 531  | 567  | 488  | 478  | 373  | 330  | 333  | 296  | 329  | 287  |
| Mean Medical Debt (normalized to 2013)    | 0.75 | 0.86 | 0.84 | 0.95 | 1.00 | 1.00 | 0.92 | 0.90 | 0.98 | 0.84 | 0.93 | 0.90 |
| Mean Nonmedical Debt (normalized to 2013) | 1.12 | 1.13 | 1.09 | 1.16 | 1.00 | 0.98 | 0.76 | 0.68 | 0.68 | 0.61 | 0.68 | 0.59 |

**eTable 9. Regression Estimates<sup>a</sup>**

| <b>Dependent Variable: Percentage Change in Mean Flow of Nonmedical Debt, 2020-2013</b> |                       |                       |                       |                    |                    |
|-----------------------------------------------------------------------------------------|-----------------------|-----------------------|-----------------------|--------------------|--------------------|
|                                                                                         | <b>(1)</b>            | <b>(2)</b>            | <b>(3)</b>            | <b>(4)</b>         | <b>(5)</b>         |
| Expanded in 2014 (dummy)                                                                | -4.5(-13.2 to 4.2)    | -5.1(-12.7 to 2.4)    | -5.3(-13.1 to 2.4)    | -3.1(-11.2 to 4.9) | 4.5(-1.5 to 10.5)  |
| Expanded after 2014 (dummy)                                                             | 3.2(-4.2 to 10.6)     | 0.9(-6.9 to 8.6)      | 0.5(-7.2 to 8.2)      | 1.2(-6.2 to 8.5)   | 3.3(-2.6 to 9.1)   |
| Constant                                                                                | -40.9(-46.6 to -35.3) | -25.1(-37.3 to -13.0) | -27.1(-43.6 to -10.7) | 1.6(-23.1 to 26.2) | 5.8(-12.4 to 23.9) |
| <i>Controls</i>                                                                         |                       |                       |                       |                    |                    |
| Change in unemployment rate                                                             |                       | x                     | x                     | x                  | x                  |
| Change in % 65+ age old                                                                 |                       |                       | x                     | x                  | x                  |
| Change in % with bachelor's degree or higher (25+ years old)                            |                       |                       |                       | x                  | x                  |
| Change in median income                                                                 |                       |                       |                       |                    | x                  |
| N                                                                                       | 51                    | 51                    | 51                    | 51                 | 51                 |
| Adjusted R-squared                                                                      | 0.035                 | 0.156                 | 0.139                 | 0.299              | 0.596              |

Change of Expanded in 2014: -45.4(-52.1 to -38.8); Change of Expanded after 2014: -37.7(-42.4 to -33.0); Change of Did not expand: -40.9(-46.6 to -35.3).

<sup>a</sup> State level regression weighted by population in 2018 5-year ACS (analytic weight). Controls are from 1-year ACS. All dollar amounts are inflated adjusted to June 2020. 95% confidence intervals in parentheses.

## eReferences

1. Oster E. Unobservable selection and coefficient stability: Theory and evidence. *JBES*. 2019 Apr;37(2):187-204. doi:10.1080/07350015.2016.1227711
2. Sacarny A. provider-of-services. GitHub. n.d. Accessed March 14, 2020.  
<https://github.com/asacarny/provider-of-services>
3. Hoadley J, Lucia K, Kona M. State efforts to protect consumers from balance billing. *The Commonwealth Fund*. 2019 Jan 18. Accessed March 14, 2020.  
<https://www.commonwealthfund.org/blog/2019/state-efforts-protect-consumers-balance-billing>
4. Fedaseyeu V. Debt collection agencies and the supply of consumer credit. *J Financ Econ*. 2020;138.1:93-221. doi:10.1016/j.jfineco.2020.05.002
5. Fonseca J, Zafar B. Access to credit and financial health: Evaluating the impact of debt collection. Working paper. n.d. Accessed March 14, 2020.  
[https://scholar.princeton.edu/sites/default/files/juliafonseca/files/fonseca\\_zafar.pdf](https://scholar.princeton.edu/sites/default/files/juliafonseca/files/fonseca_zafar.pdf)
